# Supplementary material for: S-Doped hierarchical graphene decorated with Co-porphyrins as an efficient electrocatalyst for zinc–air batteries
Source: Royal Society of Chemistry journal article supplement (doi:10.1039/d0nj03443f), 2020-01-01
Supplement: d0nj03443f1.pdf [file d0nj03443f1.pdf]

*Supporting information*

**S-doped hierarchical graphene decorated with Coporphyrins as an efficient electrocatalyst for Zinc-Air Batteries**

Zhi-Jie Peng,<sup>‡</sup> Jiao Zhao,<sup>‡</sup> Lei Gu, Xuan-Long Sun, Hai-Lang Jia,\* Ming-Yun Guan and Shuai-Shuai Ma\*

School of Chemical and Environmental Engineering, Institute of Advanced Functional Materials for Energy, Jiangsu University of Technology, Changzhou 213001, P. R. China.

## Electrochemical measurements

A conventional three-electrode system was employed to evaluate the electrocatalytic performance of the obtained catalyst on a CHI 760E electrochemical workstation. A rotating disk electrode (RDE) with a glassy carbon (GC) disk (electrode area: 0.1256 cm<sup>2</sup>) was used as the working electrode, Ag/AgCl was used as the reference electrode, and platinum wire was used as the counter electrode. The rotating ring disk electrode measurements for ORR were carried out on RRDE in a N<sub>2</sub> or O<sub>2</sub>-saturated 0.1 M KOH electrolyte solution at a scan rate of 10 mV/s at various rotation rates of 400, 600, 900, 1200, 1600rpm. Linear sweep voltammetry (LSV) at a scan rate of 10 mV/s was conducted in 0.1 M KOH at room temperature. Before the electrochemical measurements, the electrolyte solution was purged with O<sub>2</sub> for 30 min to achieve an O<sub>2</sub>-saturated solution, and stable polarization curves were recorded after 20 cycles. All the potentials were converted to the potential versus the reversible hydrogen electrode (RHE) according to  $E_{vsRHE} = E_{vsAg/AgCl} + E_oAg/AgCl + 0.059 \text{ pH}$ . The RDE measurements were performed at different rotating speeds from 400 to 1600 rpm at a scan rate of 10 mV s<sup>-1</sup>. Koutecky-Levich plots were used to investigate the effective electron-transfer number and the mass-transport corrected current density for ORR at different potentials. According to the Koutecky-Levich equation:

$$\frac{1}{J} = \frac{1}{J_K} + \frac{1}{J_L} = \frac{1}{J_k} + \frac{1}{B\omega^{1/2}} \quad (1)$$

$$B = 0.62nFC_0(D_0)^{2/3}\nu^{-1/6} \quad (2)$$

$$J_k = nFkC_0 \quad (3)$$

Where  $\omega$  is the angular velocity,  $J$  is the measured current density,  $J_K$  and  $J_L$  are the kinetic and diffusion-limiting current densities.  $F$  is Faraday constant (96485 C mol<sup>-1</sup>),  $D_0$  is the diffusion coefficient of O<sub>2</sub> (1.9×10<sup>-5</sup> cm<sup>2</sup> s<sup>-1</sup>),  $\nu$  is the kinetic viscosity of the electrolyte (0.01 cm<sup>2</sup> s<sup>-1</sup>) and  $C_0$  is the bulk concentration of O<sub>2</sub> (1.2×10<sup>-6</sup> mol cm<sup>-3</sup>),  $n$  is the electron transfer number.  $B$  can be determined from the slope of the K-

L plots, and then the electron transfer number  $n$  can be obtained.

Rotating ring-disk electrode (RRDE) measurements were recorded with catalyst inks and electrodes prepared by the same method as that for the RDE measurements. The  $\text{H}_2\text{O}_2$  produced and the electron number ( $n$ ) transferred during the ORR were calculated using the following equations:

$$n = 4 \frac{I_D}{I_D + I_R/N}$$

$$\text{H}_2\text{O}_2\% = 100 \times \frac{4 - n}{2}$$

The rotating ring-disk electrode was employed to detect the  $\text{H}_2\text{O}_2$  yield, where the ring potential was set to 1.3 V (vs. RHE). where  $I_D$  is the Faradaic current at the disk,  $I_R$  is the Faradaic current at the ring, and  $N= 0.37$  is the collection efficiency of ring electrode.

The measurements of the zinc–air batteries were performed using home-built electrochemical cells. The electrolyte was 6.0 M KOH/0.2 M zinc acetate. Zinc foil was used as the anode and the catalyst of Por/S/rGO or Pt/C sprayed onto the foamed nickel (1 cm × 1 cm) with a loading of 2 mg cm<sup>-2</sup> was used as the air-cathode, respectively. Cell guard 3501 membrane was used for a separator. The GDL had an effective area of 1 cm<sup>2</sup> and allows O<sub>2</sub> from ambient air to reach the catalyst sites. Measurements were carried out on the as-fabricated cell with a CHI 760E electrochemical workstation and a LAND CT2001A multichannel battery testing system at room temperature.

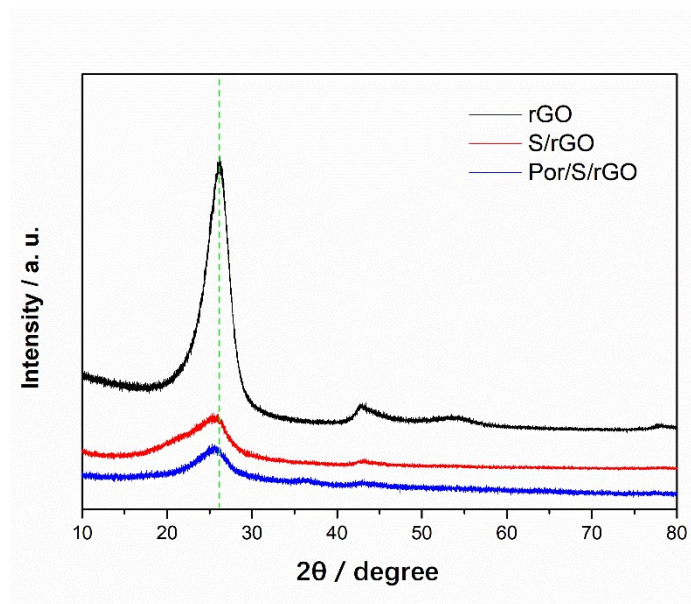

**Fig. S1** XRD of rGO, S/rGO, and Por/S/rGO.

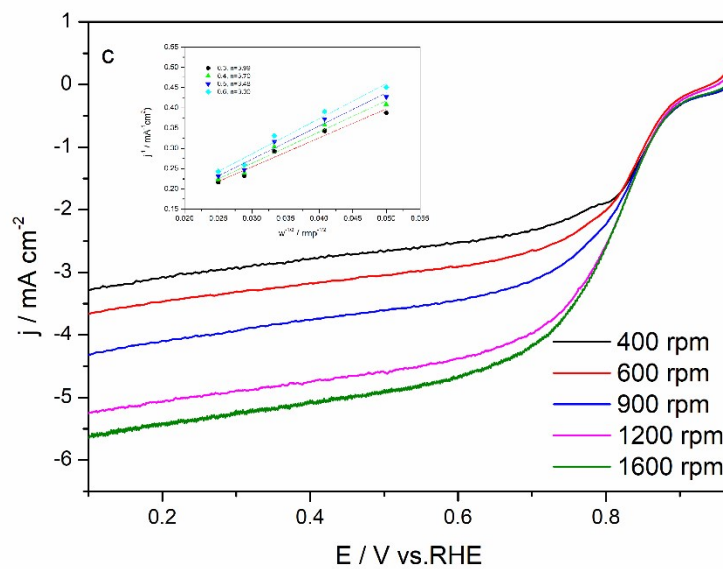

**Fig. S2** LSV of Por/S/rGO in O<sub>2</sub>-saturated 0.1 M KOH solution at different rotation rates, the illustration is corresponding K–L plots.

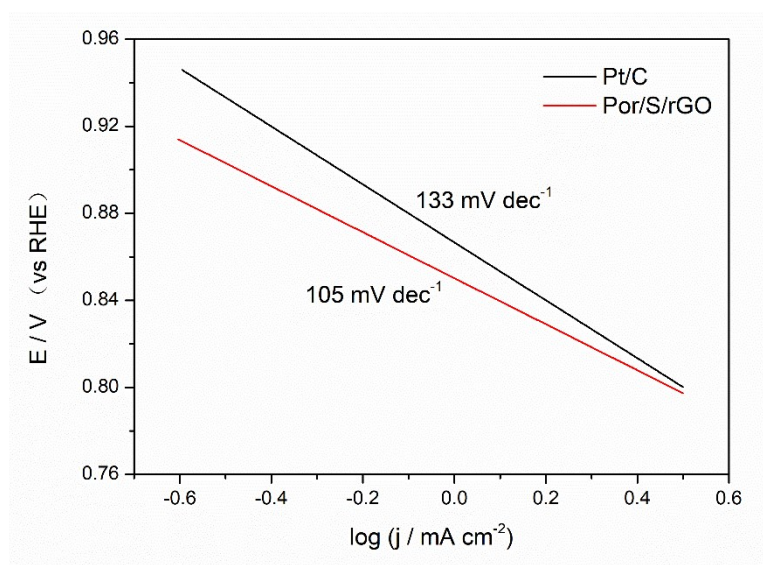

**Fig. S3** Tafel plots of Por/S/rGO and Pt/C.

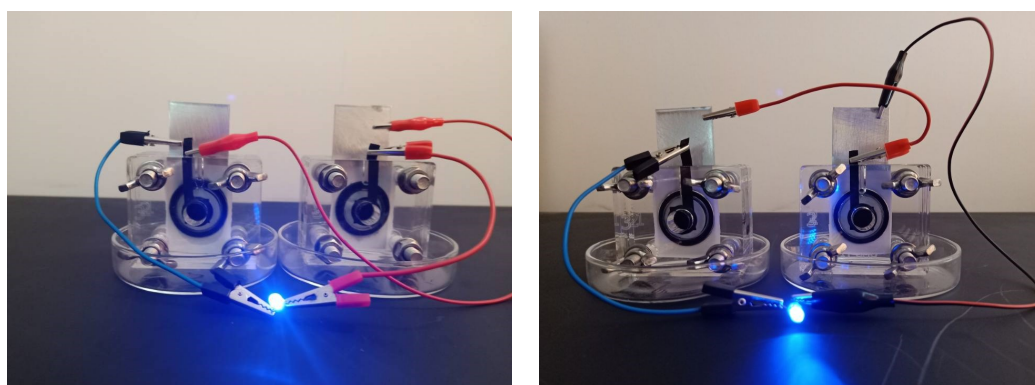

**Fig. S4** Two Zn-air batteries were connected in series to supply adequate voltage to power the colored LEDs (2.5 V), Por/S/rGO (left), Pt/C (right).

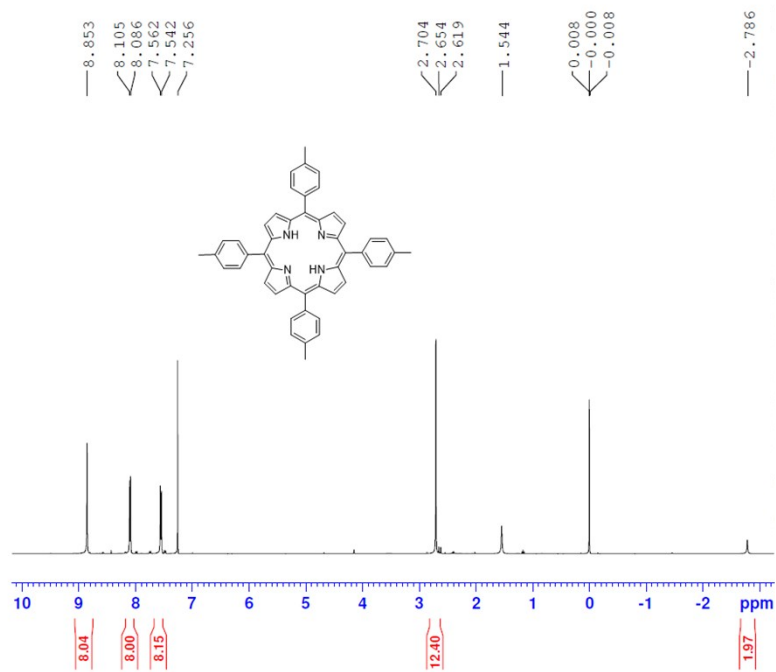

**Fig. S5** The <sup>1</sup>H NMR of 5,10,15,20-tetrakis(4-methylphenyl)-21,22-dihydroporphyrin
